# Supplementary material for: Evolutionary study of duplications of the miRNA machinery in aphids associated with striking rate acceleration and changes in expression profiles
Source: PubMed Central journal article supplement (PMC3536612; doi:10.1186/1471-2148-12-216), 2012-11-12
Supplement: 1471-2148-12-216-S1.pdf [file 1471-2148-12-216-S1.pdf]

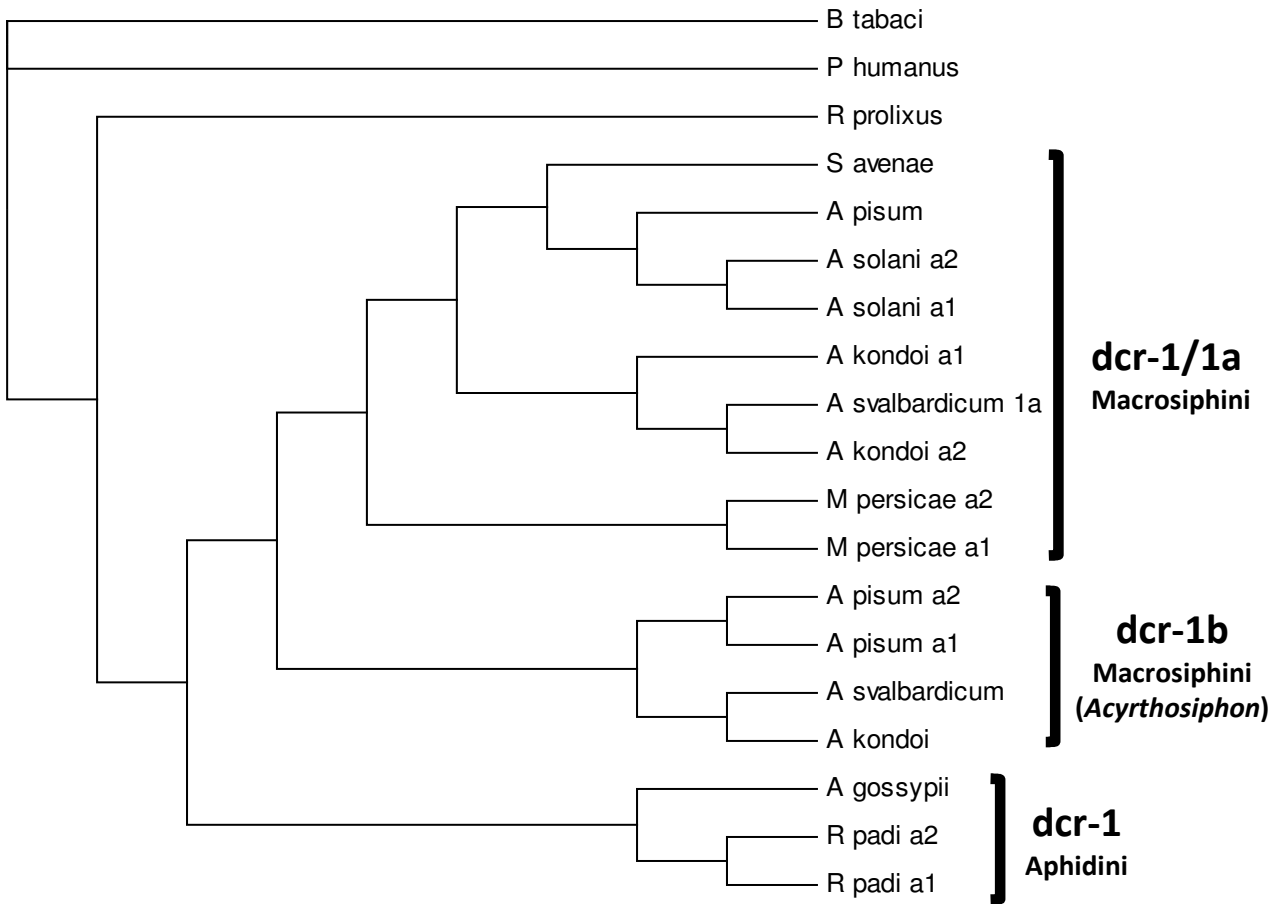

# Hypothesis 1

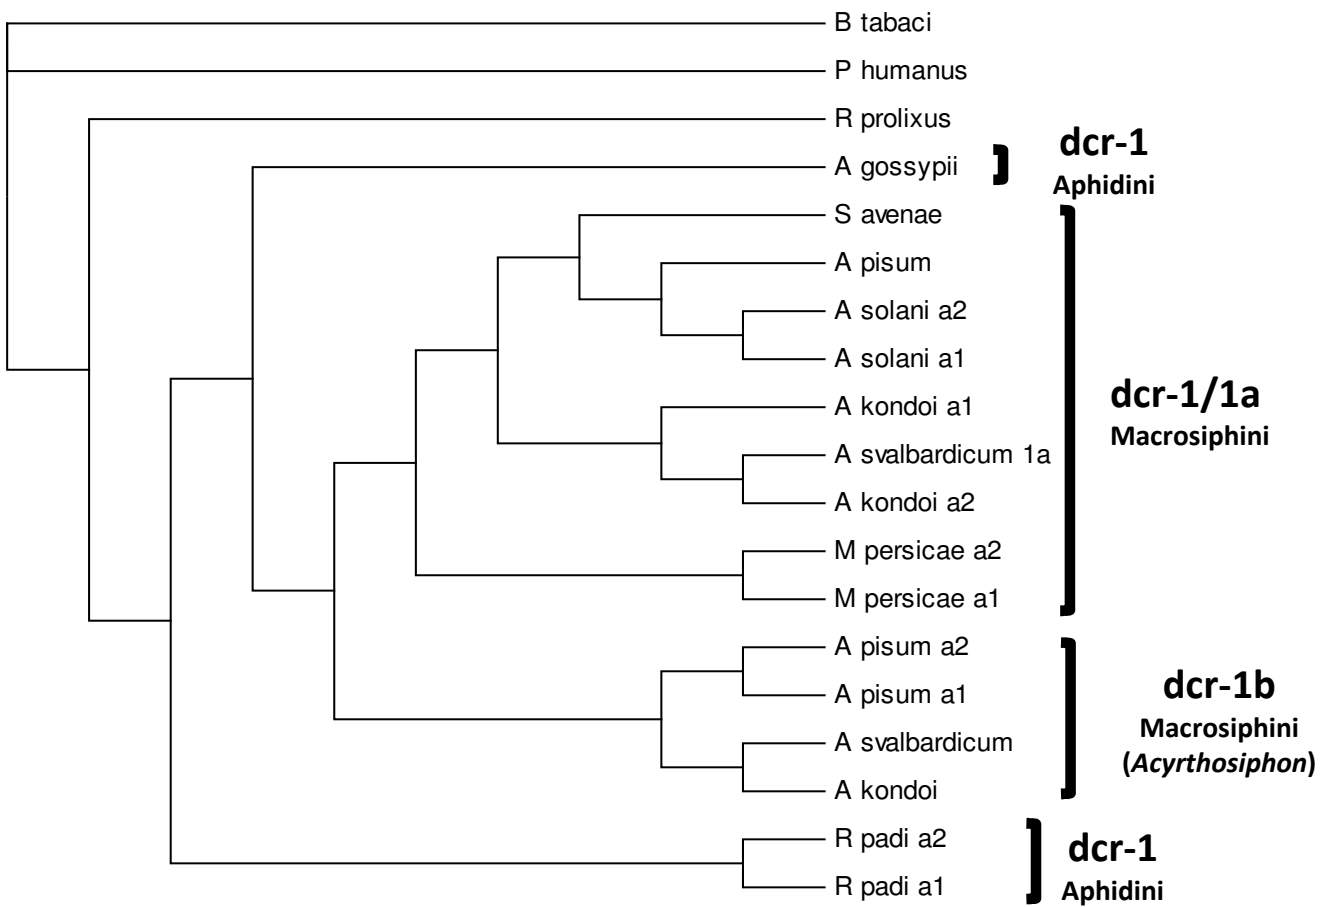

## Hypothesis 2

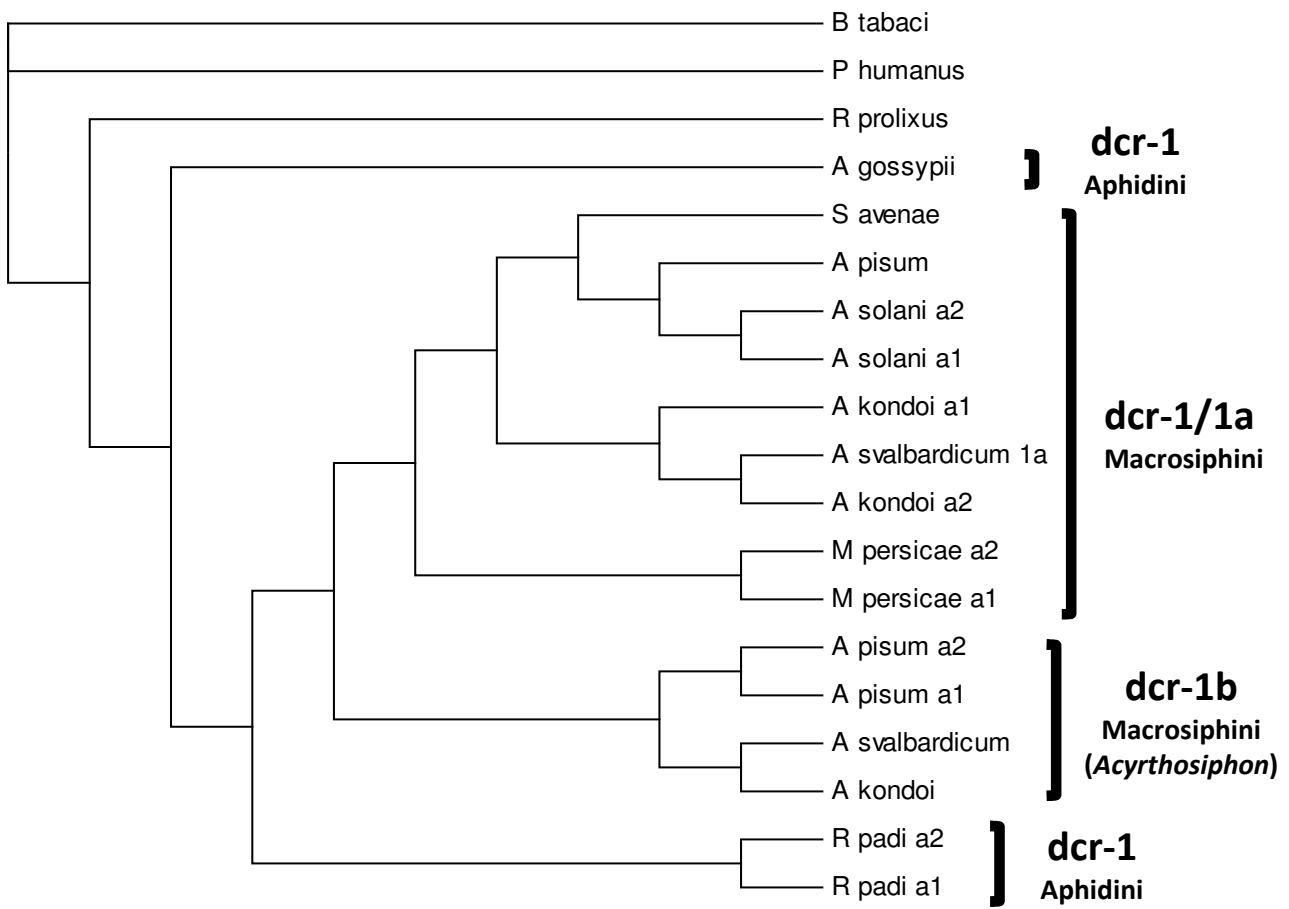

## Hypothesis 3

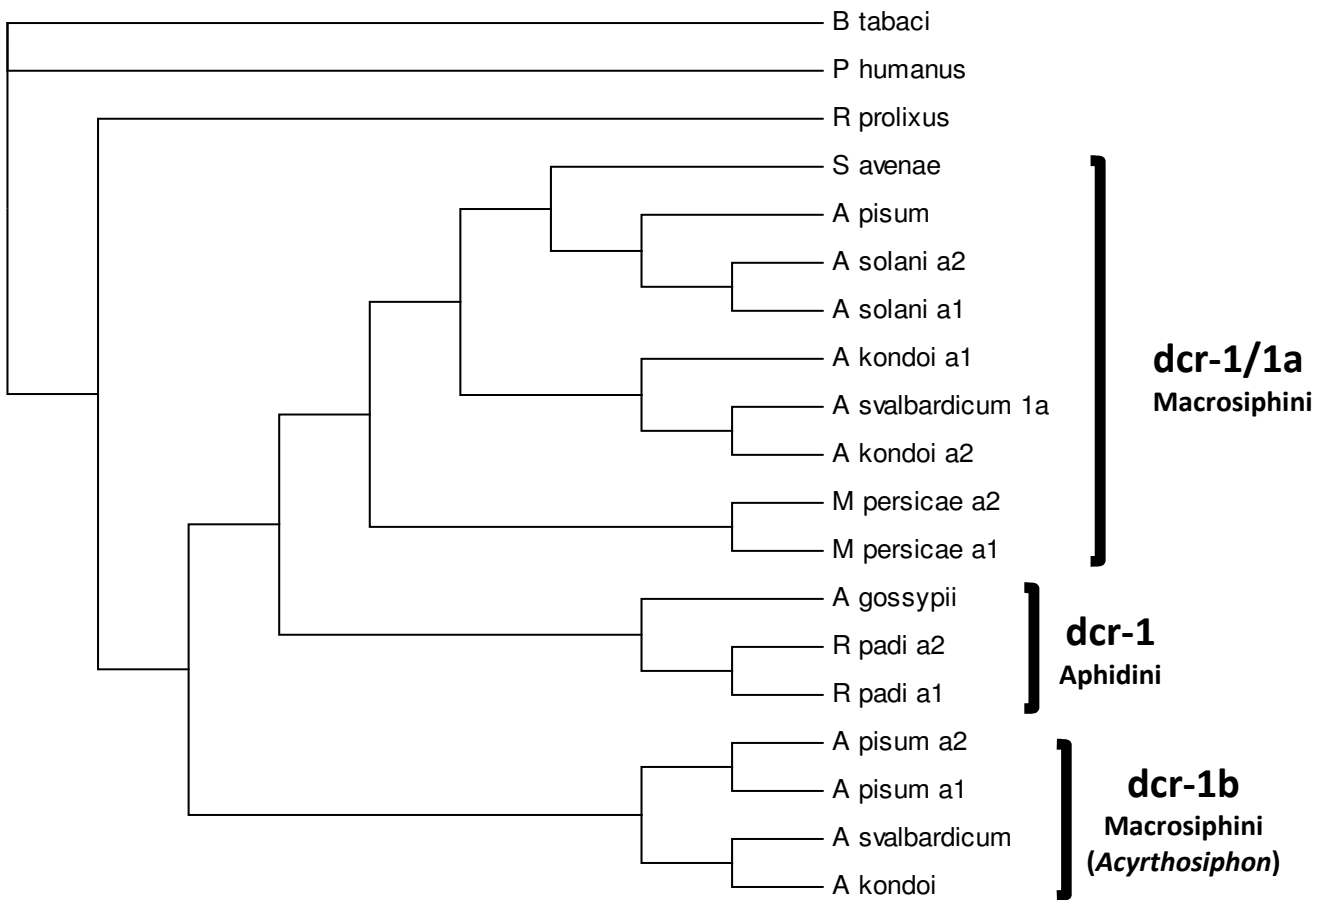

## Hypothesis 4

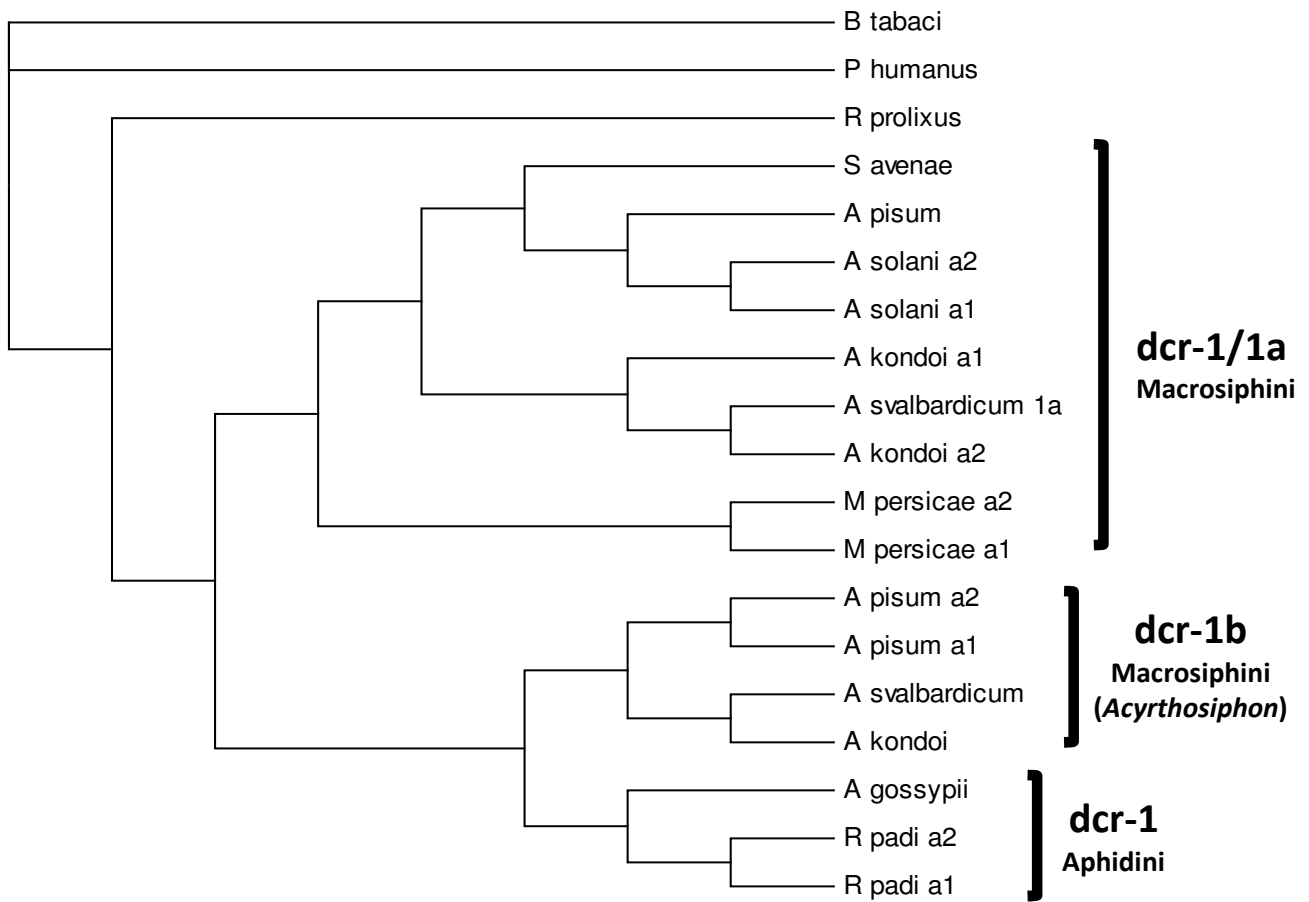

## Hypothesis 5

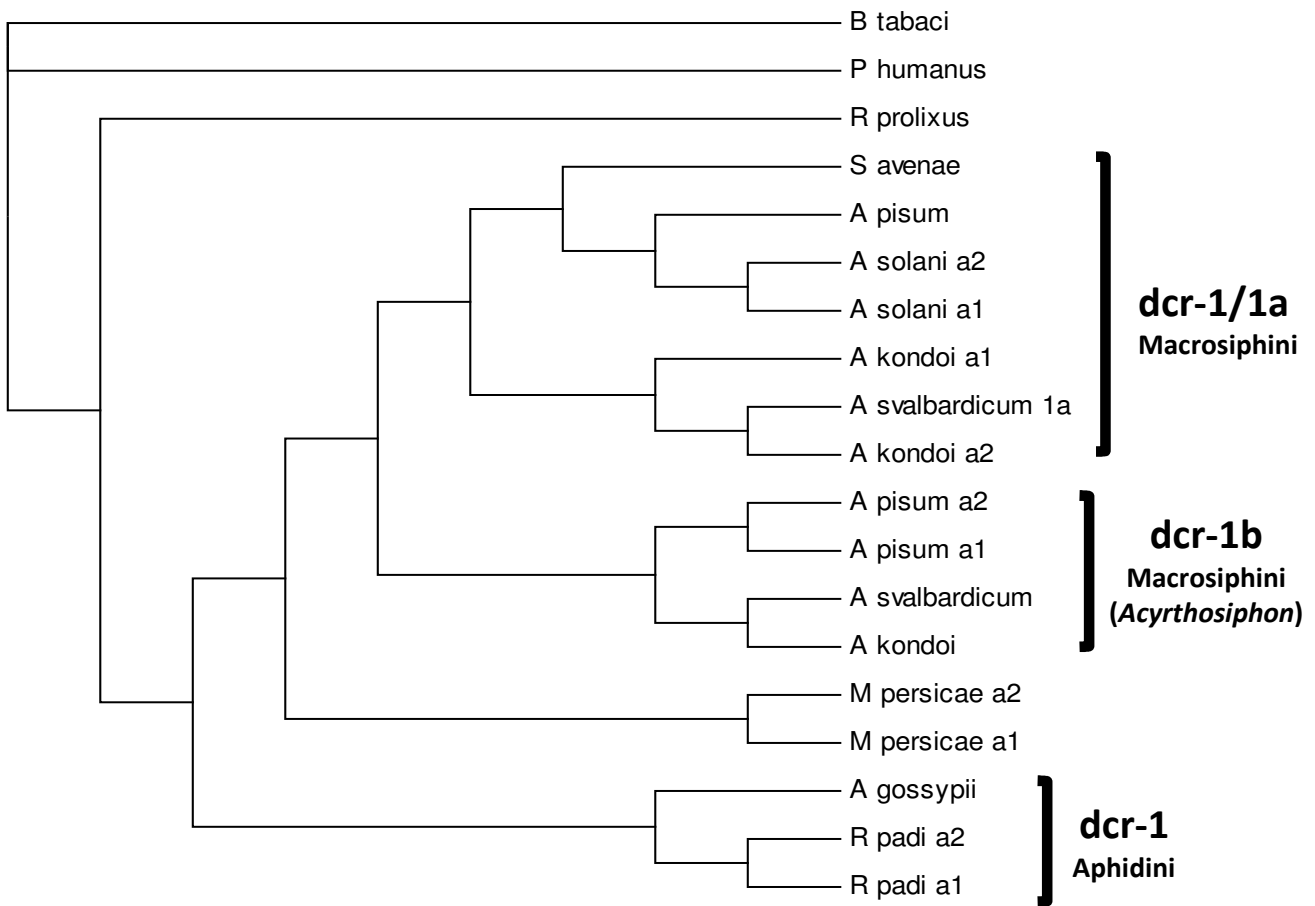

## Hypothesis 6

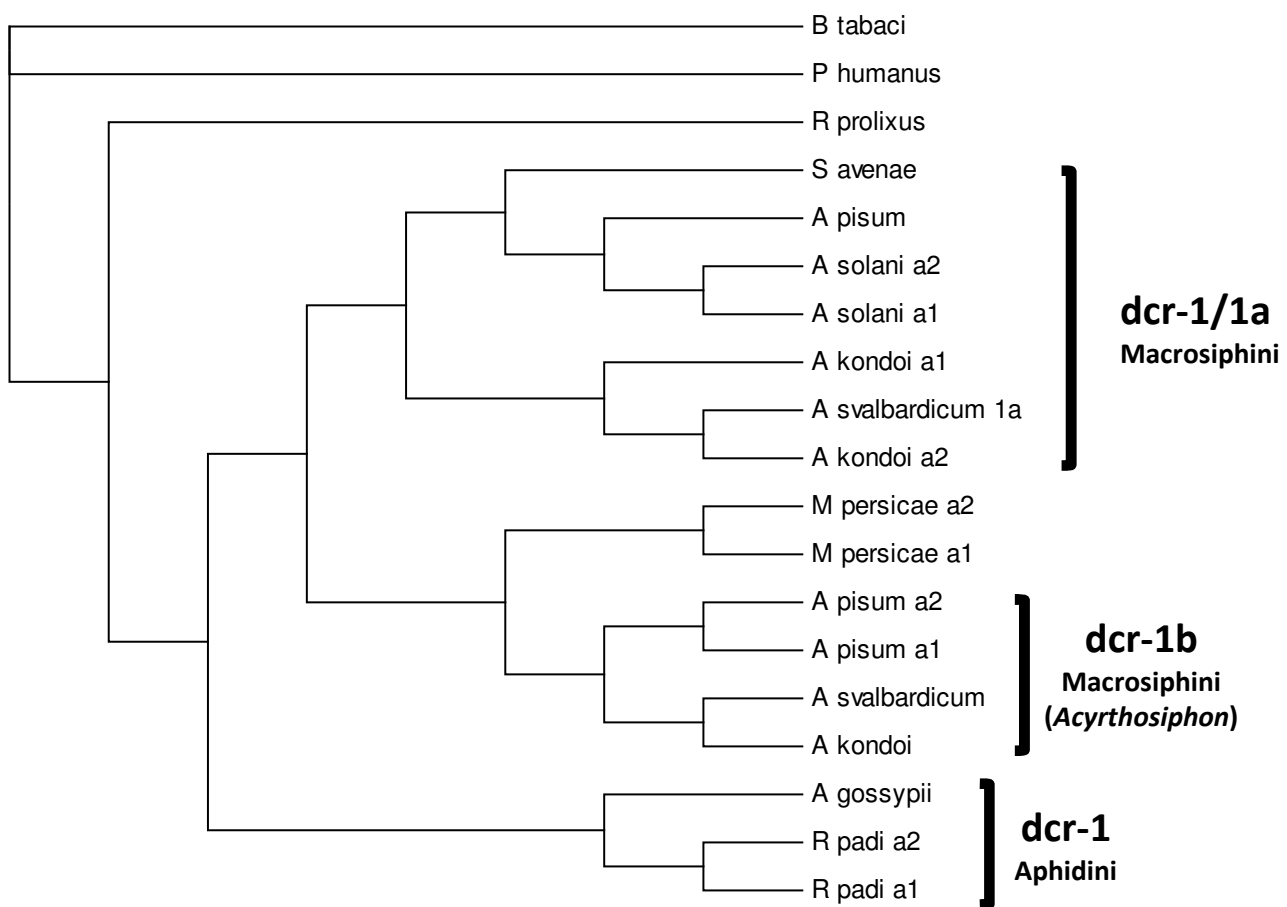

## Hypothesis 7
