# Supplementary material for: Evolutionary study of duplications of the miRNA machinery in aphids associated with striking rate acceleration and changes in expression profiles
Source: PubMed Central journal article supplement (PMC3536612; doi:10.1186/1471-2148-12-216), 2012-11-12
Supplement: 1471-2148-12-216-S4.pdf [file 1471-2148-12-216-S4.pdf]

**Supplementary Table 1.** PCR primers used in this study, ordered in relative positions from 5' to 3' of the corresponding gene/region.

| Primer name       | Primer sequence (5' to 3') | Forward (f)<br>or reverse (r) | Notes                                         |
|-------------------|----------------------------|-------------------------------|-----------------------------------------------|
| <i>ago-1</i>      |                            |                               |                                               |
| <i>Region 1</i>   |                            |                               |                                               |
| <u>Ago1Reg1F1</u> | ccaaatytrggacgagaa         | f                             |                                               |
| <u>Ago1a-r1F1</u> | ccgaccaattgtgcttcgtg       | f                             | Specific to copy -1a                          |
| <u>Ago1b-r1F1</u> | ccgaccaattaggcttcgta       | f                             | Specific to copy -1b                          |
| Ago1a-r1F2        | ccattgcctattggaacga        | f                             | Specific to copy -1a                          |
| Ago1b-r1F2        | ccattgcctattggaaggaa       | f                             | Specific to copy -1b                          |
| Ago1b-r1F3Mp      | tgggtgaatcattagaaggta      | f                             | Specific to copy -1b of <i>M. persicae</i>    |
| Ago1b-r1F3        | ggcwgacagaagaccaatacc      | f                             | Specific to copy -1b                          |
| Ago1b-r1R2        | tagatggctgcawtgactgg       | r                             | Specific to copy -1b                          |
| Ago1b-r1R2Mp      | tagatggccggagtgactgg       | r                             | Specific to copy -1b of <i>M. persicae</i>    |
| Ago1Reg1F2        | ccwwcwmaatggaaaatgatgct    | f                             |                                               |
| <u>Ago1Reg1R1</u> | ttgcrtttgagctggtytc        | r                             |                                               |
| <u>Ago1a-r1R1</u> | tgcttacgattgcattgag        | r                             | Specific to copy -1a                          |
| <u>Ago1b-r1R1</u> | tgcttacgtttgcgtttgag       | r                             | Specific to copy -1b                          |
| <i>Region 2</i>   |                            |                               |                                               |
| <u>Ago1Reg2F1</u> | aaggmaactgyaagragtg        | f                             |                                               |
| <u>Ago1a-r2F2</u> | ctcctgatcgtgaacgagag       | f                             | Specific to copy -1a                          |
| <u>Ago1b-r2F2</u> | ctcctgcacgtgaacaagat       | f                             | Specific to copy -1b                          |
| Ago1Reg2F2        | caatagcttgytttgcayc        | f                             |                                               |
| Ago1a-r2F1        | gtgcgtgaggatgcgtaag        | f                             | Specific to copy -1a                          |
| Ago1b-r2F1        | gtgcgcgatgatgctataaa       | f                             | Specific to copy -1b                          |
| Ago1Reg2F3        | kcyacwcaatgtgtcaagc        | f                             |                                               |
| Ago1Reg2F4        | caatgtgttcaagcdaaaat       | f                             |                                               |
| Ago1Reg2R2        | attgrtaccrccaattca         | r                             |                                               |
| Ago1b-r2R1Ag      | gcagcaattgattgtgtaatg      | r                             | Specific to copy -1b of <i>Aphis gossypii</i> |

|                   |                      |   |                      |
|-------------------|----------------------|---|----------------------|
| <u>Ago1Reg2R1</u> | ccttcgcatactccatcrcg | r |                      |
| <u>Ago1a-r2R1</u> | actgtccttcggatactcca | r | Specific to copy -1a |
| <u>Ago1b-r2R1</u> | gctgtccttcggatactcca | r | Specific to copy -1b |

### Region 3

|                   |                      |   |                                                   |
|-------------------|----------------------|---|---------------------------------------------------|
| <u>Ago1Reg3F1</u> | agckattcgagaggcaatgt | f |                                                   |
| <u>Ago1a-r3F1</u> | cagctattcgagaggcatgt | f | Specific to copy -1a                              |
| <u>Ago1b-r3F1</u> | tggcgattcgagaggcatgt | f | Specific to copy -1b                              |
| Ago1b-r3R2Ag      | ccgggtttgtaatccacttc | r | Specific to copy -1b of <i>Aphis gossypii</i>     |
| Ago1a-r3R2Rp      | ttccggattgttcctttttg | r | Specific to copy -1a of <i>Rhopalosiphum padi</i> |
| Ago1b-r3R2Rp      | attcatccgactcgaaatgg | r | Specific to copy -1b of <i>Rhopalosiphum padi</i> |
| Ago1a-r3R2Ag      | atgacttgggcgacttgctc | r | Specific to copy -1a of <i>Aphis gossypii</i>     |
| <u>Ago1a-r3R1</u> | ccggtgcaggtatagacaca | r | Specific to copy -1a                              |
| <u>Ago1b-r3R1</u> | ccggtgcaggtatagatata | r | Specific to copy -1b                              |
| <u>Ago1Reg3R1</u> | ccggtgcaggtatagayaya | r |                                                   |

### *dcr-1*

|                 |                         |   |                                                |
|-----------------|-------------------------|---|------------------------------------------------|
| Dcr1bF0         | cctaattggatggagataggg   | f | For longer sequence in <i>Acyrtosiphon</i> spp |
| <u>Dic1abF1</u> | tgggarttaaattcaaacactgg | f |                                                |
| Dcr1abF2        | tcrggrccaartccwagt      | f |                                                |
| Dcr1abF3        | ttrgaaacrathggwgattc    | f |                                                |
| Dcr1bF2         | ttgagccccgtagtaattgg    | f | For longer sequence in <i>Acyrtosiphon</i> spp |
| Dic1abR2        | ggcatgrgtcatdgcytgta    | r |                                                |
| Dcr1bR2         | aatgcaccacgantaccaca    | r | For longer sequence in <i>Acyrtosiphon</i> spp |
| <u>Dic1abR1</u> | cgattgggrtaataagaagca   | r |                                                |
| Dcr1bR0         | ccattctctcttgatagc      | r | For longer sequence in <i>Acyrtosiphon</i> spp |
| Dcr1bR3         | cccgaactgattcaaaaat     | r | For longer sequence in <i>Acyrtosiphon</i> spp |

The primers mainly used for amplification of each region/gene are underlined.
