# Supplementary material for: Evolutionary study of duplications of the miRNA machinery in aphids associated with striking rate acceleration and changes in expression profiles
Source: PubMed Central journal article supplement (PMC3536612; doi:10.1186/1471-2148-12-216), 2012-11-12
Supplement: 1471-2148-12-216-S5.pdf [file 1471-2148-12-216-S5.pdf]

**Supplementary Table 2.** PCR primers used for semiquantitative RT-PCRs

| <b>Gene</b>      | <b>Primer</b> | <b>Sequence (5'-3')</b>     | <b>Tm</b> | <b>cycles</b> |
|------------------|---------------|-----------------------------|-----------|---------------|
| <i>Api-dcr1a</i> | Api-dcr1aF    | TGGGAGTTAAATTCAAACACTGG     | 60        | 38            |
|                  | Api-dcr1aR    | CGATTGGGGTAATAAGAAGCA       | 60        | 38            |
| <i>Api-dcr1b</i> | Api-dcr1bF    | CAGCAGCCAAATGTGCTTTA        | 56        | 38            |
|                  | Api-dcr1bR    | CAATTCACTCTGATCAATCTATTCAAA | 56        | 38            |
| <i>Api-ago1a</i> | Api-ago1aF    | AAAAAGATTACTGCGCAACAT       | 58        | 36            |
|                  | Api-ago1aR    | TGTTTGTTACAACCTAACCCC       | 58        | 36            |
| <i>Api-ago1b</i> | Api-ago1bF    | ATTGGCGCGAGCTATTACAG        | 58        | 38            |
|                  | Api-ago1bR    | CACGAAATTACACGGAAACG        | 58        | 38            |
